# Supplementary material
Source: PubMed Central journal article supplement (PMC8646686)
Supplement: ADTS-4-2100152-s004.pdf [file ADTS-4-2100152-s004.pdf]

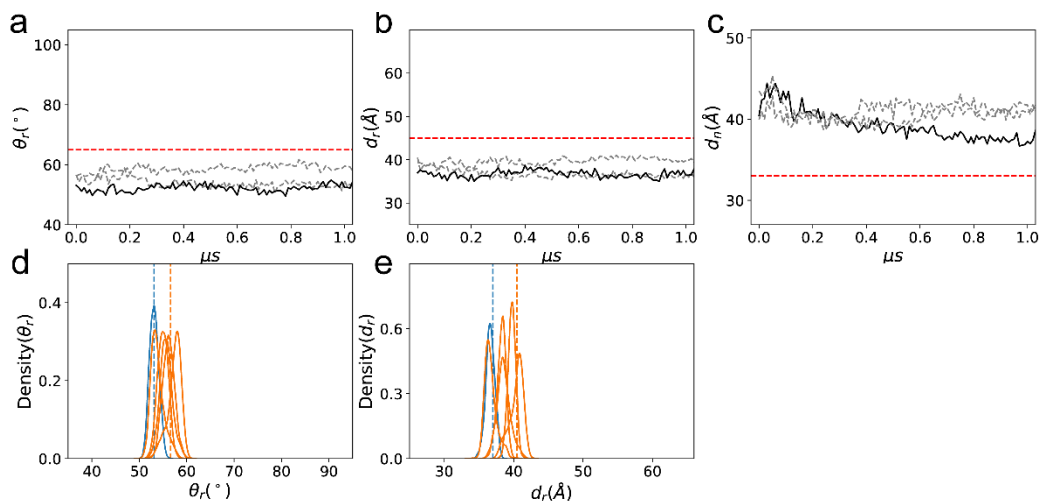

**Figure S1.** Illustration of the relative motions between the NTD and the downward RBD in the closed system. a-c, Evolution of the three metrics in the whole simulation. The downward RBD of chain C and its adjacent NTD of chain A in the closed system are picked from one repeat for evaluation. Chains with the selected NTD or RBD are illustrated in black solid lines, respectively, while the remaining chains are shown in grey dashed lines. The red dashed lines are shown as reference to capture the differences between simulation systems. d-e, Probability distributions of the angle ( $\theta_r$ ) and the distance ( $d_r$ ) as collected from the simulations to illustrate the movement of the downward RBDs of chain C (blue solid lines). The distributions of downward RBDs of chain A (orange solid lines) are taken as control. The blue dashed lines and the orange dashed lines indicate the corresponding values of the initial structures of the downward RBDs of chain C and chain A, respectively.

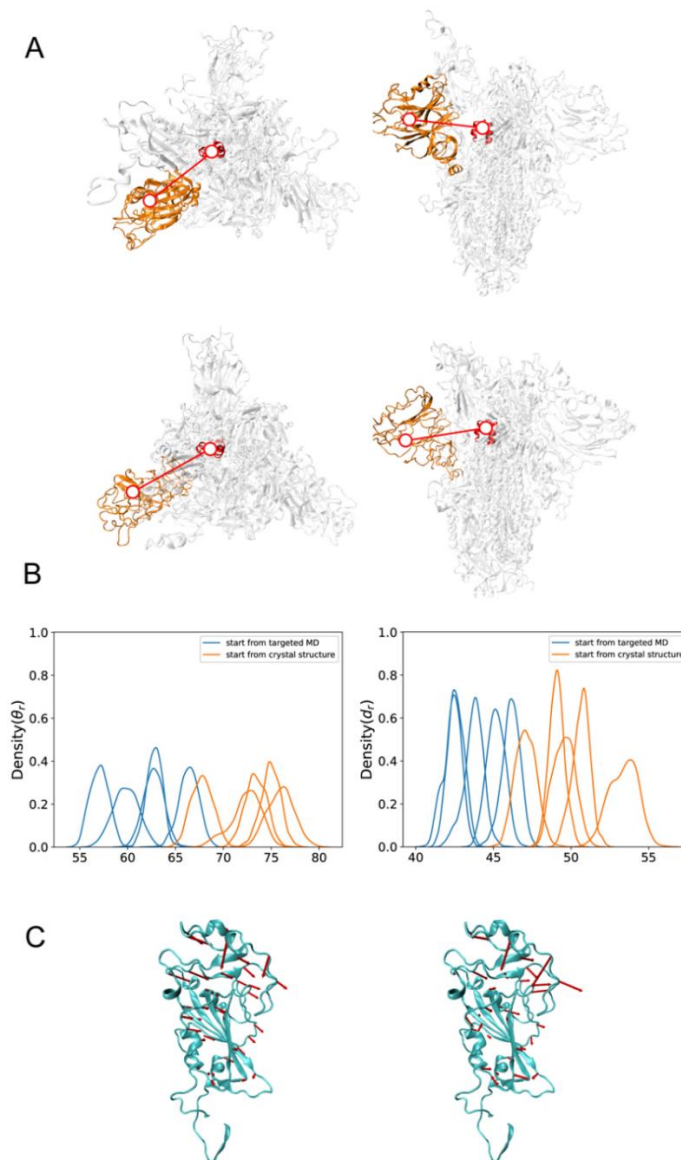

**Figure S2.** Illustration of conformational changes by aMD in the partially open system with the NTD forced out by the preceding tMD simulation. (A) Top view and side view of conformations before (top row) and after (bottom row) the simulation with tMD. The NTD of Chain C is highlighted in orange, and the central axis is highlighted in red. The blank line in the side view shows the distance between the center of the NTD and the central axis. (B) Distributions of RBD angle ( $\theta_r$ ) and RBD distance ( $d_r$ ) of chain B. The last 200 ns trajectory in each repeat was used for evaluation. Trajectories starting from the NTD-forced-out state are colored blue, while those starting from the crystal structure are colored orange. (C) Analysis of slow motions of the RBD in the NTD-force-out simulations. Red arrows illustrate residue motions in the first principal component (left) and the first tIC (right) using snapshots from the first 200 ns.

A

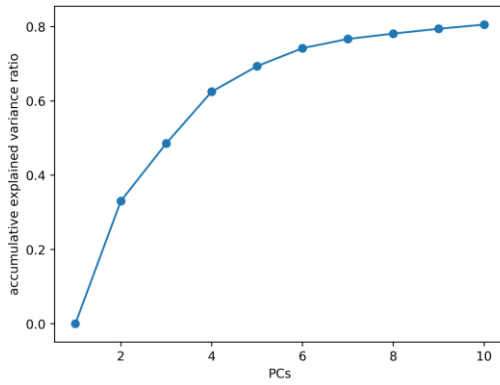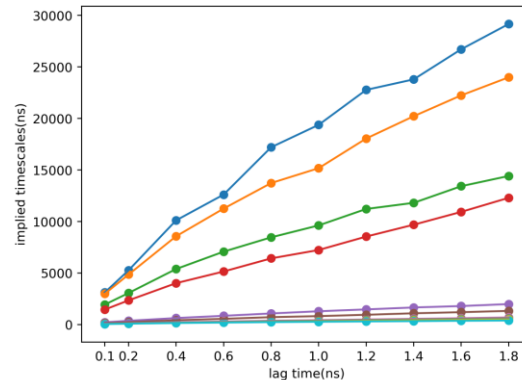

B

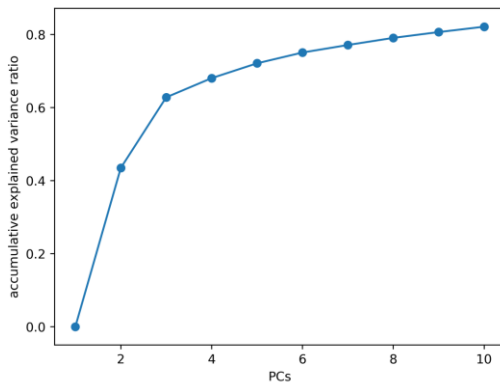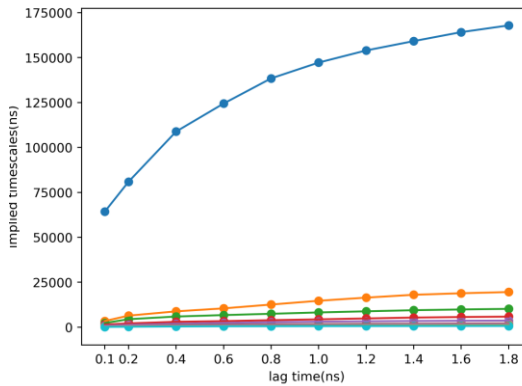

**Figure S3.** Illustration of parameter selection in the Markov State Model. (A) MSM in the partially open system to show the mode characterized by NTD wedging in and RBD being blocked. (B) MSM in the semi-open system to show the mode characterized by NTD moving out and RBD tilting downward. The left column shows accumulative variance ratios explained by top PCs, and the right column illustrates the first ten levels of timescales implied by the model with a chosen number of microstates of 100.

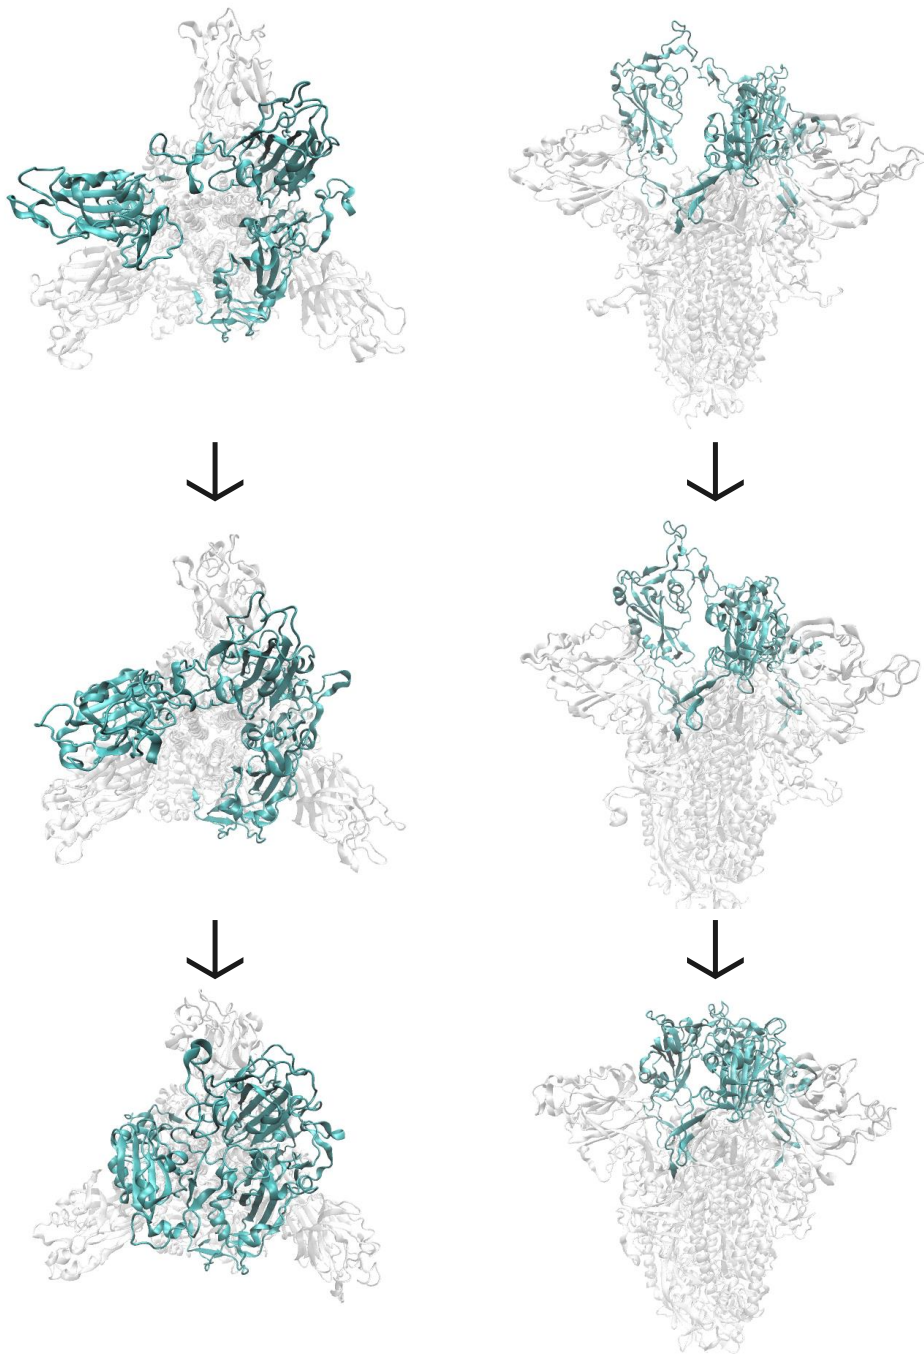

**Figure S4.** Interactions among RBDs in the semi-open system. The initial structure, a representative structure with two upward RBDs interacting with each other and a representative structure with all upward RBDs falling down to form close interactions are shown in the top, middle and bottom rows, respectively. The top view and side view are shown in the left and right columns, respectively.

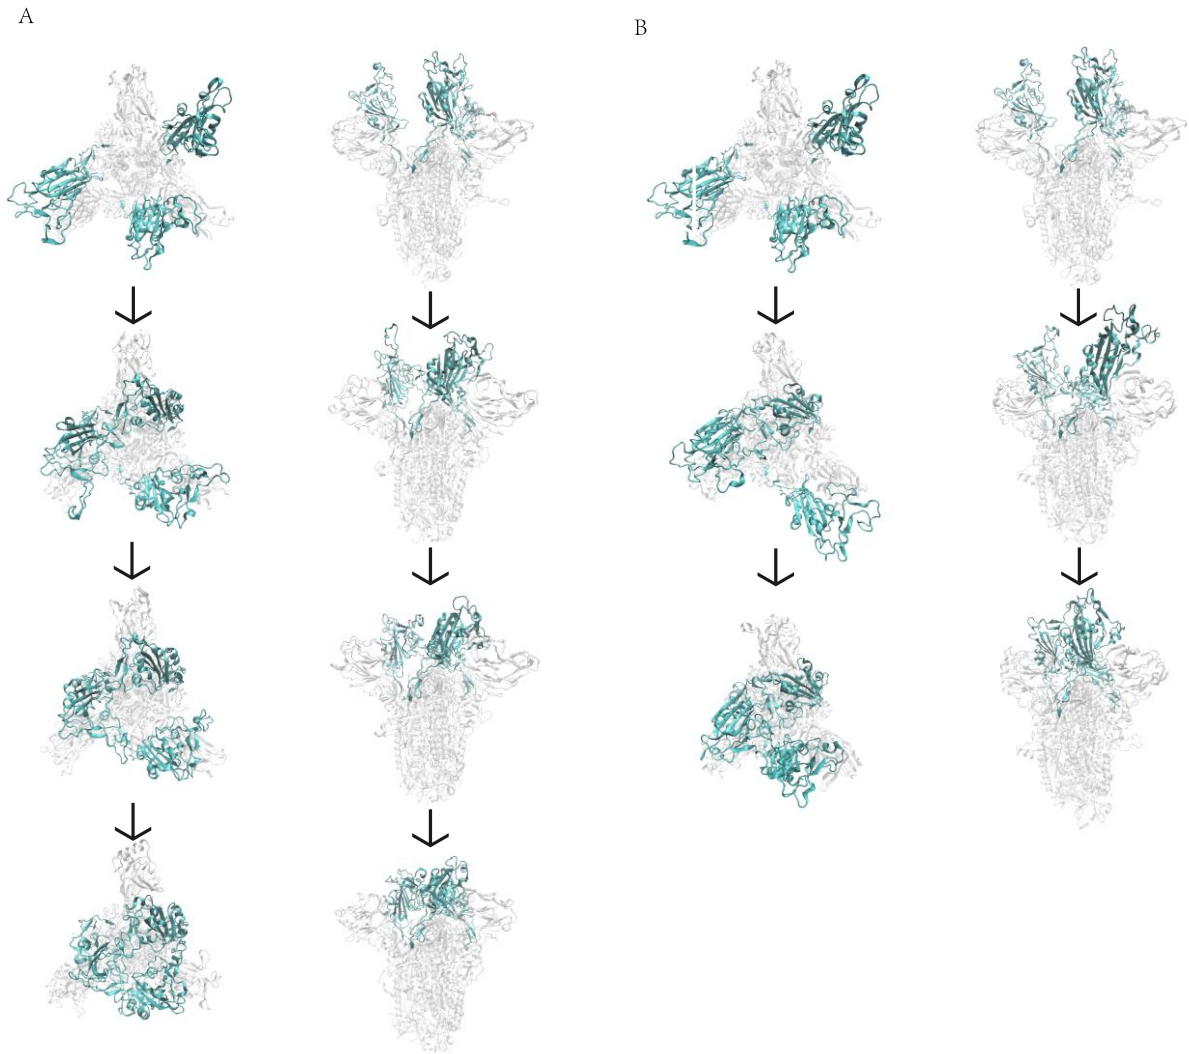

**Figure S5.** Interactions among RBDs in the open system. (A) A process with all three upward RBDs falling. Pairwise interactions between RBDs form gradually. (B) A process with two RBDs falling and one RBD remaining upright. Compared with (A), the RBD remaining upright formed interactions with only one RBD that tilted down.

**Table S1.** One-way ANOVA analysis of the relative motions of the NTD and the RBD in the simulation systems.

| Simulation system | Mode           | Category | df | F          | P value |
|-------------------|----------------|----------|----|------------|---------|
| Partially open    | NTD wedging in | Group    | 1  | 34.24188   | <<0.01  |
|                   |                | Error    | 8  |            |         |
| Semi-open         | NTD wedging in | Group    | 1  | 168.197113 | <<0.01  |
|                   |                | Error    | 4  |            |         |
| Semi-open         | NTD moving out | Group    | 1  | 0.601643   | 0.5191  |
|                   |                | Error    | 2  |            |         |
| Open              | NTD wedging in | Group    | 1  | 84.83      | <<0.01  |
|                   |                | Error    | 3  |            |         |
| Open              | NTD moving out | Group    | 1  | 0.01       | 0.9275  |
|                   |                | Error    | 3  |            |         |

The average RBD angle of the last 200ns trajectory in each system was used for significance test.

**Table S2.** Key residue pairs lumped into different groups in the partially open system.

| Lump   | Macro 0       | Macro 1   | Macro 2       | Macro 3       | Macro 4       | Macro 5                             |
|--------|---------------|-----------|---------------|---------------|---------------|-------------------------------------|
| Green  | R357-<br>A163 |           | R357-<br>A163 | R355-<br>A163 | R357-E132     | R355-S162                           |
|        |               |           | R357-<br>N165 | R357-C166     | R357-<br>N165 | K356-<br>Y160                       |
|        |               |           | R357-C166     | R357-T167     | N394-<br>N165 | R357-<br>V159                       |
|        |               |           | R357-T167     | R357-E169     |               | R357-<br>Y160                       |
|        |               |           | R357-E169     | N394-T167     |               | R357-S161                           |
|        |               |           |               | N394-F168     |               | R357-S162                           |
|        |               |           |               |               |               | R357-<br>N164                       |
|        |               |           |               |               |               | R357-C166                           |
|        |               |           |               |               |               | S359-Y160                           |
|        |               |           |               |               |               | N394-T167                           |
| Red    |               |           | P521-P230     | P521-Y200     | H519-<br>G232 | H519-P230                           |
|        |               |           |               | P521-P230     | H519-I233     | H519-I231                           |
|        |               |           |               |               |               | H519-<br>G232<br>A520-P230          |
| Yellow | P521-F168     | P521-F168 |               |               |               | A520-F168<br>P521-F168<br>P521-Y170 |
| Purple | N360-T167     |           |               | N360-F168     | N360-T167     | N360-E169                           |
|        |               |           |               | N360-<br>Y170 | N360-E169     |                                     |
| Blue   |               |           |               | R346-T160     |               |                                     |

The first residue in each residue pair is the residue index of RBD in chain B and the second one is the residue index of NTD in chain C.

**Table S3.** Key residue pairs lumped into different groups in the semi-open system.

| Lump   | Macro 0 | Macro 1                                          | Macro 2                                          | Macro 3                                                                                              |
|--------|---------|--------------------------------------------------|--------------------------------------------------|------------------------------------------------------------------------------------------------------|
| Green  |         |                                                  | T345-N164<br>T345-N165<br>R346-E132<br>R346-N165 |                                                                                                      |
| Red    |         |                                                  |                                                  | N334-D198<br>N334-Y200<br>L335-P230                                                                  |
| Brown  |         |                                                  |                                                  | V367-Q115<br>N370-T114<br>N370-Q115<br>N370-E132<br>N370-N165<br>N370-T167<br>S371-Q115<br>S373-E132 |
| Purple |         | N334-T167<br>N334-F168                           |                                                  |                                                                                                      |
| Yellow |         | E340-K129<br>E340-C166<br>K356-E132<br>K356-N165 |                                                  |                                                                                                      |
| Blue   |         |                                                  |                                                  | E340-I233                                                                                            |

The first residue in each residue pair is the residue index of RBD in chain B and the second one is the residue index of NTD in chain C.



**Table S4.** The top 20 chemical compounds with the highest binding affinities to the NTD in ZINC15 database.

| Chemical compounds | Molecular Formula | Affinity<br>(kcal/mol) |
|--------------------|-------------------|------------------------|
| ZINC000261494659   | C45H47NO18        | -13.8                  |
| ZINC000261494656   | C45H47NO18        | -13.5                  |
| ZINC000261494657   | C45H47NO18        | -13.3                  |
| ZINC000169369935   | C47H51NO15        | -12.8                  |
| ZINC000169362007   | C44H57NO17        | -12.6                  |
| ZINC000261494658   | C45H47NO18        | -12.5                  |
| ZINC000085914855   | C43H53NO14        | -12.2                  |
| ZINC000003934128   | C44H32N4O4        | -12.2                  |
| ZINC000095627868   | C43H59NO16        | -12.2                  |
| ZINC000256109542   | C35H54O11         | -12.2                  |
| ZINC000256109534   | C35H54O11         | -12.1                  |
| ZINC000252286876   | C47H75NO17        | -12.0                  |
| ZINC000245190612   | C47H75NO17        | -11.9                  |
| ZINC000252286878   | C47H75NO17        | -11.9                  |
| ZINC000261494696   | C24H34O5S         | -11.8                  |
| ZINC000118915227   | C24H34O5S         | -11.7                  |
| ZINC000256109538   | C35H54O11         | -11.7                  |
| ZINC000245190613   | C47H75NO17        | -11.7                  |
| ZINC000169338351   | C47H51NO15        | -11.6                  |
| ZINC000169742991   | C46H56N4O12       | -11.6                  |

**Table S5.** The detected compounds in the prescription for Han Shi Yu Fei Zheng.

| Symptom                    | State of illness | Herb name                        | Detected compounds       | Binding Affinity |
|----------------------------|------------------|----------------------------------|--------------------------|------------------|
| Han Shi<br>Yu Fei<br>Zheng | Mild             | Notopterygii Rhizoma Et Radix    | chrysoeriol,7-rutinoside | -9.5             |
|                            |                  | Lepidii Semen Descurainiae Semen | evobioside               | -9.9             |
|                            |                  |                                  | Helveticoside            | -9.6             |
|                            |                  | Fortunes Bossfern Rhizome        | Filicene                 | -9.7             |
|                            |                  | Eupatorium Fortunei Turcz        | O-Acetyl-beta-amyrin     | -9.6             |

**Table. S6.** The detected compounds in the prescription for Shi Re Yun Fei Zheng

| Symptom                                                  | State of illness | Herb name            | Detected compounds           | Binding Affinity        |      |
|----------------------------------------------------------|------------------|----------------------|------------------------------|-------------------------|------|
| Shi Re Yun Fei Zheng                                     | Mild             | Amomum Tsao-Ko       | quercetin,3-o-rutinoside     | -9.8                    |      |
|                                                          |                  | Crevostet            |                              |                         |      |
|                                                          |                  | Anemarrhenae Rhizoma | Timosaponin B III            | -10.5                   |      |
|                                                          |                  |                      | Tingenone                    | -10                     |      |
|                                                          |                  |                      | Smilagenin                   | -9.8                    |      |
|                                                          |                  |                      | Desglucolanatigonin II       | -9.8                    |      |
|                                                          |                  |                      | Timosaponin A III            | -9.8                    |      |
|                                                          |                  |                      | neogitogenin                 | -9.7                    |      |
|                                                          |                  |                      | Timosaponin A-III            | -9.6                    |      |
|                                                          |                  |                      | xilingsaponin A              | -9.5                    |      |
|                                                          |                  |                      | (-)-Caryophyllene oxide      | -9.5                    |      |
|                                                          |                  |                      | Scutellariae Radix           | 5-o-caffeoylquinic acid | -9.8 |
|                                                          |                  | Radix Bupleuri       | 3'-O-Acetylsaikosaponin D Qt | -9.8                    |      |
|                                                          |                  |                      | Saikosaponin D               | -9.7                    |      |
|                                                          |                  |                      | saikosaponin c               | -9.5                    |      |
|                                                          |                  |                      | saikosaponin c Qt            | -9.5                    |      |
|                                                          |                  |                      | Radix Paeoniae Rubra         | Amyrin                  | -9.7 |
|                                                          |                  |                      |                              | Friedelin               | -9.7 |
|                                                          |                  | Eugeniin             |                              | -9.7                    |      |
|                                                          |                  | galloylpaeoniflorine |                              | -9.7                    |      |
|                                                          |                  | Forsythiae Fructus   | C10230                       | -10.6                   |      |
|                                                          |                  |                      | Procyanidin                  | -9.7                    |      |
|                                                          |                  |                      | Forsythoside C               | -9.5                    |      |
|                                                          |                  | Artemisia Annua L.   | artesanate                   | -9.9                    |      |
|                                                          |                  |                      | Friedelin                    | -9.7                    |      |
|                                                          |                  | Isatidis Folium      | Thladioside H1               | -11.0                   |      |
| 6-(3-oxoindolin-2-ylidene)indolo[2,1-b]quinazolin-12-one | -9.9             |                      |                              |                         |      |

**Table S7.** The detected compounds in the prescription for Shi Du Yu Fei Zheng

| Symptom                | State of illness | Herb name                               | Detected compounds                                                                                                                                                                                                                  | Binding Affinity |
|------------------------|------------------|-----------------------------------------|-------------------------------------------------------------------------------------------------------------------------------------------------------------------------------------------------------------------------------------|------------------|
| Shi Du Yu<br>Fei Zheng | Moderate         | Amygdalus<br>Communis Vas               | Licochalcone B                                                                                                                                                                                                                      | -9.5             |
|                        |                  | Pogostemon<br>Cablin (Blanco)<br>Benth. | Friedelin                                                                                                                                                                                                                           | -9.7             |
|                        |                  | Polygoni<br>Cuspidati                   | Chrysophanol-8-O-beta-D-(6'-<br>O-galloyl)-glucopyranoside                                                                                                                                                                          | -9.9             |
|                        |                  | Rhizoma Et<br>Radix                     | Quercetin-3-rhamnoside-7-<br>glucoside                                                                                                                                                                                              | -9.7             |
|                        |                  | Verbenae Herb                           | (+)-Limacine                                                                                                                                                                                                                        | -9.6             |
|                        |                  |                                         | beta-carotene                                                                                                                                                                                                                       | -9.6             |
|                        |                  |                                         | Scolymoside                                                                                                                                                                                                                         | -9.5             |
|                        |                  | Lepidii Semen                           | evobioside                                                                                                                                                                                                                          | -9.9             |
|                        |                  | Descurainiae<br>Semen                   | Helveticoside                                                                                                                                                                                                                       | -9.6             |
|                        |                  | Citri Grandis<br>Exocarpium             | (2S)-7-[(2S,3R,4S,5S,6R)-4,5-<br>dihydroxy-6-methylol-3-<br>[(2S,3R,4R,5R,6S)-3,4,5-<br>trihydroxy-6-methyl-<br>tetrahydropyran-2-yl]oxy-<br>tetrahydropyran-2-yl]oxy-5-<br>hydroxy-2-(3-hydroxy-5-<br>methoxy-phenyl)chroman-4-one | -9.5             |

**Table S8.** The detected compounds in the prescription for Han Shi Zu Fei Zheng

| Symptom                 | State of illness | Herb name                        | Detected compounds                                                                                                                                                                                                                          | Binding Affinity |
|-------------------------|------------------|----------------------------------|---------------------------------------------------------------------------------------------------------------------------------------------------------------------------------------------------------------------------------------------|------------------|
| Han Shi Zu<br>Fei Zheng | Moderate         | Citrus Reticulata                | (2S)-7-<br>[(2S,3R,4S,5S,6R)-4,5-<br>dihydroxy-6-methylol-3-<br>[(2S,3R,4R,5R,6S)-3,4,5-<br>trihydroxy-6-methyl-<br>tetrahydropyran-2-yl]oxy-<br>tetrahydropyran-2-yl]oxy-<br>5-hydroxy-2-(3-hydroxy-<br>5-methoxy-<br>phenyl)chroman-4-one | -9.5             |
|                         |                  | Amomum Tsao-Ko<br>Crevostet      | quercetin,3-o-rutinoside                                                                                                                                                                                                                    | -9.8             |
|                         |                  | Notopterygii Rhizoma<br>Et Radix | chrysoeriol,7-rutinoside                                                                                                                                                                                                                    | -9.5             |

**Table S9.** The detected compounds in the prescription for Yi Du Bi Fei Zheng

| Symptom                  | State of illness     | Herb name              | Detected compounds       | Binding Affinity |
|--------------------------|----------------------|------------------------|--------------------------|------------------|
| Yi Du Bi<br>Fei<br>Zheng | Severe               | licorice               | licorice-saponin F3      | -10.1            |
|                          |                      |                        | licorice-saponin K2      | -10.1            |
|                          |                      |                        | schaftoside              | -10.1            |
|                          |                      |                        | licorice-saponin F3_qt   | -10.0            |
|                          |                      |                        | Hispaglabridin B         | -10.0            |
|                          |                      |                        | beta-Glycyrrhetic acid   | -10.0            |
|                          |                      |                        | 18beta-glycyrrhetic acid | -9.9             |
|                          |                      |                        | licorice-saponin J2      | -9.8             |
|                          |                      |                        | glabrolide               | -9.8             |
|                          |                      |                        | Xambioona                | -9.8             |
|                          |                      |                        | Kanzonol Z               | -9.7             |
|                          |                      |                        | licorice-saponin H2      | -9.6             |
|                          |                      |                        | glycyrrhizin             | -9.6             |
|                          |                      |                        | isoglabrolide            | -9.6             |
|                          |                      | Glycyram               | -9.5                     |                  |
|                          |                      | licorice-saponin C2_qt | -9.5                     |                  |
|                          |                      | Araboglycyrrhizin      | -9.5                     |                  |
|                          |                      | Amomum Tsao-Ko         | quercetin,3-o-rutinoside | -9.8             |
|                          |                      | Crevostet              |                          |                  |
|                          |                      | Lepidii Semen          | evobioside               | -9.9             |
| Descurainiae Semen       | Helveticoside        | -9.6                   |                          |                  |
| Radix Paeoniae Rubra     | Amyrin               | -9.7                   |                          |                  |
|                          | Friedelin            | -9.7                   |                          |                  |
|                          | Eugeniin             | -9.7                   |                          |                  |
|                          | galloylpaeoniflorine | -9.7                   |                          |                  |

**Table S10.** The detected compounds in the prescription for Qi Ying Liang Fan Zheng

| Symptom                       | State of illness | Herb name            | Detected compounds      | Binding Affinity |
|-------------------------------|------------------|----------------------|-------------------------|------------------|
| Qi Ying<br>Liang Fan<br>Zheng | Severe           | Anemarrhenae Rhizoma | Timosaponin B III       | -10.5            |
|                               |                  |                      | Tingenone               | -10.0            |
|                               |                  |                      | Smilagenin              | -9.8             |
|                               |                  |                      | Desglucolanatigonin II  | -9.8             |
|                               |                  |                      | Timosaponin A III       | -9.8             |
|                               |                  |                      | neogitogenin            | -9.7             |
|                               |                  |                      | Timosaponin A-III       | -9.6             |
|                               |                  |                      | xilingsaponin A         | -9.5             |
|                               |                  | Radix Paeoniae Rubra | (-)-Caryophyllene oxide | -9.5             |
|                               |                  |                      | Amyrin                  | -9.7             |
|                               |                  |                      | Friedelin               | -9.7             |
|                               |                  |                      | Eugenin                 | -9.7             |
|                               |                  | Forsythiae Fructus   | galloylpaeoniflorine    | -9.7             |
|                               |                  |                      | C10230                  | -10.6            |
|                               |                  |                      | Procyanidin             | -9.7             |
|                               |                  | Coptidis Rhizoma     | Forsythoside C          | -9.5             |
| Coptidis Rhizoma              | -9.7             |                      |                         |                  |
| Lepidii Semen                 | evobioside       |                      | -9.9                    |                  |
| Descurainiae Semen            | Helveticoside    |                      | -9.6                    |                  |

**Table S11.** The detected compounds in the prescription for Nei Bi Wai Tuo Zheng

| Symptom                    | State of illness | Herb name         | Detected compounds                                                                                                                       | Binding Affinity |
|----------------------------|------------------|-------------------|------------------------------------------------------------------------------------------------------------------------------------------|------------------|
| Nei Bi<br>Wai Tuo<br>Zheng | Very<br>severe   | Panax Ginseng     | Araloside A                                                                                                                              | -9.9             |
|                            |                  | C. A. Mey.        | Campesteryl ferulate                                                                                                                     | -9.5             |
|                            |                  | Cornus            | Cornusiin A                                                                                                                              | -10.4            |
|                            |                  | Officinalis Sieb. | Eugeniin                                                                                                                                 | -10.1            |
|                            |                  | Et Zucc.          | cornuside_qt                                                                                                                             | -9.7             |
|                            |                  |                   | 1,2,3-tri-O-galloyl- $\beta$ -D-glucose                                                                                                  | -9.6             |
|                            |                  |                   | [(2R,3R,4S,5S,6R)-4,5-dihydroxy-2-(3,4,5-trihydroxybenzoyl)oxy-6-[(3,4,5-trihydroxybenzoyl)oxymethyl]oxan-3-yl] 3,4,5-trihydroxybenzoate | -9.5             |
|                            | Cornusiin B      | -9.5              |                                                                                                                                          |                  |



**Table S12.** The detected compounds in the prescription for Fei Pi Qi Xu Zheng

| Symptom                             | State of illness | Herb name         | Detected compounds                                                                                                                                                                                      | Binding Affinity          |       |
|-------------------------------------|------------------|-------------------|---------------------------------------------------------------------------------------------------------------------------------------------------------------------------------------------------------|---------------------------|-------|
| Prescription for Fei Pi Qi Xu Zheng | convalescent     | Citrus Reticulata | (2S)-7-[(2S,3R,4S,5S,6R)-4,5-dihydroxy-6-methylol-3-[(2S,3R,4R,5R,6S)-3,4,5-trihydroxy-6-methyl-tetrahydropyran-2-yl]oxy-tetrahydropyran-2-yl]oxy-5-hydroxy-2-(3-hydroxy-5-methoxy-phenyl)chroman-4-one | -9.5                      |       |
|                                     |                  |                   | Codonopsis Radix                                                                                                                                                                                        | D-Friedoolean-14-en-3-one | -10.0 |
|                                     |                  | licorice          | Friedelin                                                                                                                                                                                               |                           | -9.7  |
|                                     |                  |                   | licorice-saponin F3                                                                                                                                                                                     |                           | -10.1 |
|                                     |                  |                   | licorice-saponin K2                                                                                                                                                                                     |                           | -10.1 |
|                                     |                  |                   | schaftoside                                                                                                                                                                                             |                           | -10.1 |
|                                     |                  |                   | licorice-saponin F3 qt                                                                                                                                                                                  |                           | -10.0 |
|                                     |                  |                   | Hispaglabridin B                                                                                                                                                                                        |                           | -10.0 |
|                                     |                  |                   | beta-Glycyrrhetic acid                                                                                                                                                                                  |                           | -10.0 |
|                                     |                  |                   | 18beta-glycyrrhetic acid                                                                                                                                                                                |                           | -9.9  |
|                                     |                  |                   | licorice-saponin J2                                                                                                                                                                                     |                           | -9.8  |
|                                     |                  |                   | glabrolide                                                                                                                                                                                              |                           | -9.8  |
|                                     |                  |                   | Xambioona                                                                                                                                                                                               |                           | -9.8  |
|                                     |                  |                   | Kanzonol Z                                                                                                                                                                                              |                           | -9.7  |
|                                     |                  |                   | licorice-saponin H2                                                                                                                                                                                     |                           | -9.6  |
|                                     |                  |                   | glycyrrhizin                                                                                                                                                                                            |                           | -9.6  |
|                                     |                  |                   | isoglabrolide                                                                                                                                                                                           |                           | -9.6  |
|                                     |                  |                   | Glycyram                                                                                                                                                                                                |                           | -9.5  |
|                                     |                  |                   | licorice-saponin C2 qt                                                                                                                                                                                  |                           | -9.5  |
|                                     |                  |                   | Araboglycyrrhizin                                                                                                                                                                                       |                           | -9.5  |

**Table S13.** The detected compounds in the prescription for Qi Yin Liang Xu Zheng.

| Symptom                     | State of illness   | Herb name              | Detected compounds   | Binding Affinity         |
|-----------------------------|--------------------|------------------------|----------------------|--------------------------|
| Qi Yin<br>Liang Xu<br>Zheng | convalescent       | Adenophrae Ae<br>Radix | Praeruptorin A       | -10.0                    |
|                             |                    |                        | Panacis              | 20(R)-Ginsenoside-Rh1_qt |
|                             |                    | Quinquefolii<br>Radix  | ginsenoside- Rh1     | -9.6                     |
|                             |                    |                        | ginsenoside Ro       | -9.5                     |
|                             |                    | Mori Follum            | Ginsenoside-Ra1      | -9.5                     |
|                             |                    |                        | Kwangsine            | -11.2                    |
|                             |                    |                        | Inophyllum E         | -10.0                    |
|                             |                    |                        | Morindin             | -9.8                     |
|                             |                    |                        | Oxysanguinarine      | -9.7                     |
|                             |                    |                        | Amyrin               | -9.7                     |
|                             |                    |                        | Friedelin            | -9.7                     |
|                             |                    |                        | beta-carotene        | -9.6                     |
|                             |                    |                        | Albanol              | -9.6                     |
|                             |                    |                        | Kuwanon H            | -9.6                     |
|                             |                    |                        | O-Acetyl-beta-amyrin | -9.6                     |
|                             |                    |                        | Campesteryl ferulate | -9.5                     |
|                             |                    |                        | b-AMYRIN             | -9.8                     |
| Phragmitis<br>Rhizoma       |                    |                        |                      |                          |
| Radix Salviae               | Neoprzewaquinone a | -11.0                  |                      |                          |

**Table S14.** The parameters of the four simulation systems.

| System         | Initial structure           | Chain length | Protein size (Å) | Water box size (Å) | Number of atoms | Ensemble |
|----------------|-----------------------------|--------------|------------------|--------------------|-----------------|----------|
| Closed         | 6VXX                        | 1,134        | 135.361          | 207.362            | 787,311         | NVT      |
|                |                             |              | 135.540          | 214.892            |                 |          |
|                |                             |              | 164.449          | 187.271            |                 |          |
| Partially open | 6VYB                        | 1,134        | 133.234          | 211.978            | 950,940         | NVT      |
|                |                             |              | 144.632          | 222.469            |                 |          |
|                |                             |              | 183.832          | 213.915            |                 |          |
| Semi-open      | Homology modeling from 6NB6 | 1,128        | 141.957          | 225.717            | 959,968         | NVT      |
|                |                             |              | 148.504          | 212.062            |                 |          |
|                |                             |              | 179.747          | 211.753            |                 |          |
| Open           | Homology modeling from 6NB7 | 1,128        | 125.889          | 224.834            | 1,059,477       | NVT      |
|                |                             |              | 131.749          | 229.366            |                 |          |
|                |                             |              | 155.418          | 215.778            |                 |          |

**Movie S1.** The movie of a replica of 1 microsecond accelerated MD for the closed system. Although the NTD of chain A has a trend of moving away from the central axis, all RBDs are finally locked in the “downward” conformation.

**Movie S2.** The movie of a replica of 1 microsecond accelerated MD for the partially open system. The upward RBD of chain B tends to tilt down while the adjacent NTD of chain C moves toward the central axis to prevent this downward movement.

**Movie S3.** The movie of a replica of 1 microsecond accelerated MD for the semi-open system. The upward RBD of chain B tends to tilt down while the adjacent NTD of chain A moves toward the central axis to prevent this downward movement.

**Movie S4.** The movie of a replica of 1 microsecond accelerated MD for the open system. The upward RBD of chain C tends to tilt down while the adjacent NTD of chain B moves toward the central axis to prevent this downward movement.

**Movie S5.** The movie of a replica of 1 microsecond accelerated MD for the semi-open system. The upward RBD of chain B reorients to the downward orientation when the NTD of chain A swings away from the central axis and then moves back to form a stable structure.

**Movie S6.** The movie of a replica of 1 microsecond accelerated MD for the open system. The upward RBD of chain B reorients to the downward orientation when the NTD of chain A swings away from the central axis and then moves back to form a stable structure.
